# Supplementary material for: In Vitro CRISPR/Cas9 Transfection and Gene-Editing Mediated by Multivalent Cationic Liposome–DNA Complexes
Source: MDPI journal article supplement (doi:10.3390/pharmaceutics14051087), 2022-05-19
Supplement: s1 [file s1]

# Supplementary Materials: In vitro CRISPR/Cas9 transfection and gene-editing mediated by Multivalent Cationic Liposome-DNA complexes

Diana A. Sousa, Ricardo Gaspar, Celso Ferreira, Fátima Baltazar, Ligia R. Rodrigues, and Bruno F.B. Silva

## Supplementary Files

**Table S1.** Biophysical characterization of monovalent (DOTAP) **(a)**, and multivalent (MVL5) **(b)** lipoplexes incorporating the PX458 plasmid at CR (+/-) 3 and CR (+/-) 10 **(c)**, respectively. The average size and zeta potential of DOTAP and MVL5-based lipoplexes were measured in ultrapure nuclease free Milli-Q water. Standard deviation (std) and Polydispersity Index (PDI) are also presented. Formulations marked with "\*" or "\*\*" showed bimodal or monomodal distributions fitted with a biexponential or monoexponential decay models, respectively.

| <b>(a)</b>        |           |      |        |      |           |      |
|-------------------|-----------|------|--------|------|-----------|------|
| CR (+/-) 3        | Size (nm) | std  | PDI    | std  | ZETA (mV) | std  |
| 80:20 DOTAP/DOPE  | 98.0      | 2.2  | 0.03   | 0.01 | 69.6      | 11.0 |
| 30:70 DOTAP/DOPE  | 111.0     | 0.8  | 0.20   | 0.02 | 71.7      | 0.5  |
| 80:20 DOTAP/DOPC  | 96.0      | 9.3  | 0.13   | 0.07 | 81.1      | 3.1  |
| 30:70 DOTAP/DOPC  | 89.3      | 3.8  | 0.22   | 0.02 | 81.7      | 6.1  |
| 80:20 DOTAP/GMO*  | 66.3      | 1.2  | Bi-Exp | -    | 71.2      | 0.9  |
| 30:70 DOTAP/GMO** | 99.0      | 12.2 | Mono   | -    | 66.0      | 3.3  |
| <b>(b)</b>        |           |      |        |      |           |      |
| CR (+/-) 3        | Size (nm) | std  | PDI    | std  | ZETA (mV) | std  |
| 50:50 MVL5/DOPC   | 92.0      | 25.7 | 0.25   | 0.08 | 64.0      | 46.4 |
| 50:50 MVL5/DOPE   | 149.0     | 11.2 | 0.23   | 0.21 | 10.86     | 20.2 |
| 75:25 MVL5/DOPE** | 76.0      | 14.3 | Bi-Exp | -    | 12.94     | 19.6 |
| 50:50 MVL5/GMO**  | 81.0      | 12.8 | Bi-Exp | -    | 102.34    | 9.9  |
| <b>(c)</b>        |           |      |        |      |           |      |
| CR (+/-) 10       | Size (nm) | std  | PDI    | std  | ZETA (mV) | std  |
| 50:50 MVL5/DOPC   | 105.3     | 7.7  | 0.3    | 0.11 | 49.4      | 23.9 |
| 50:50 MVL5/DOPE   | 97.2      | 1.9  | 0.3    | 0.02 | 47.1      | 6.0  |
| 75:25 MVL5/DOPE   | 118.0     | 9    | 0.2    | 0.08 | 30.7      | 12.0 |
| 50:50 MVL5/GMO    | 98.5      | 4.5  | 0.3    | 0.14 | 46.1      | 13.1 |

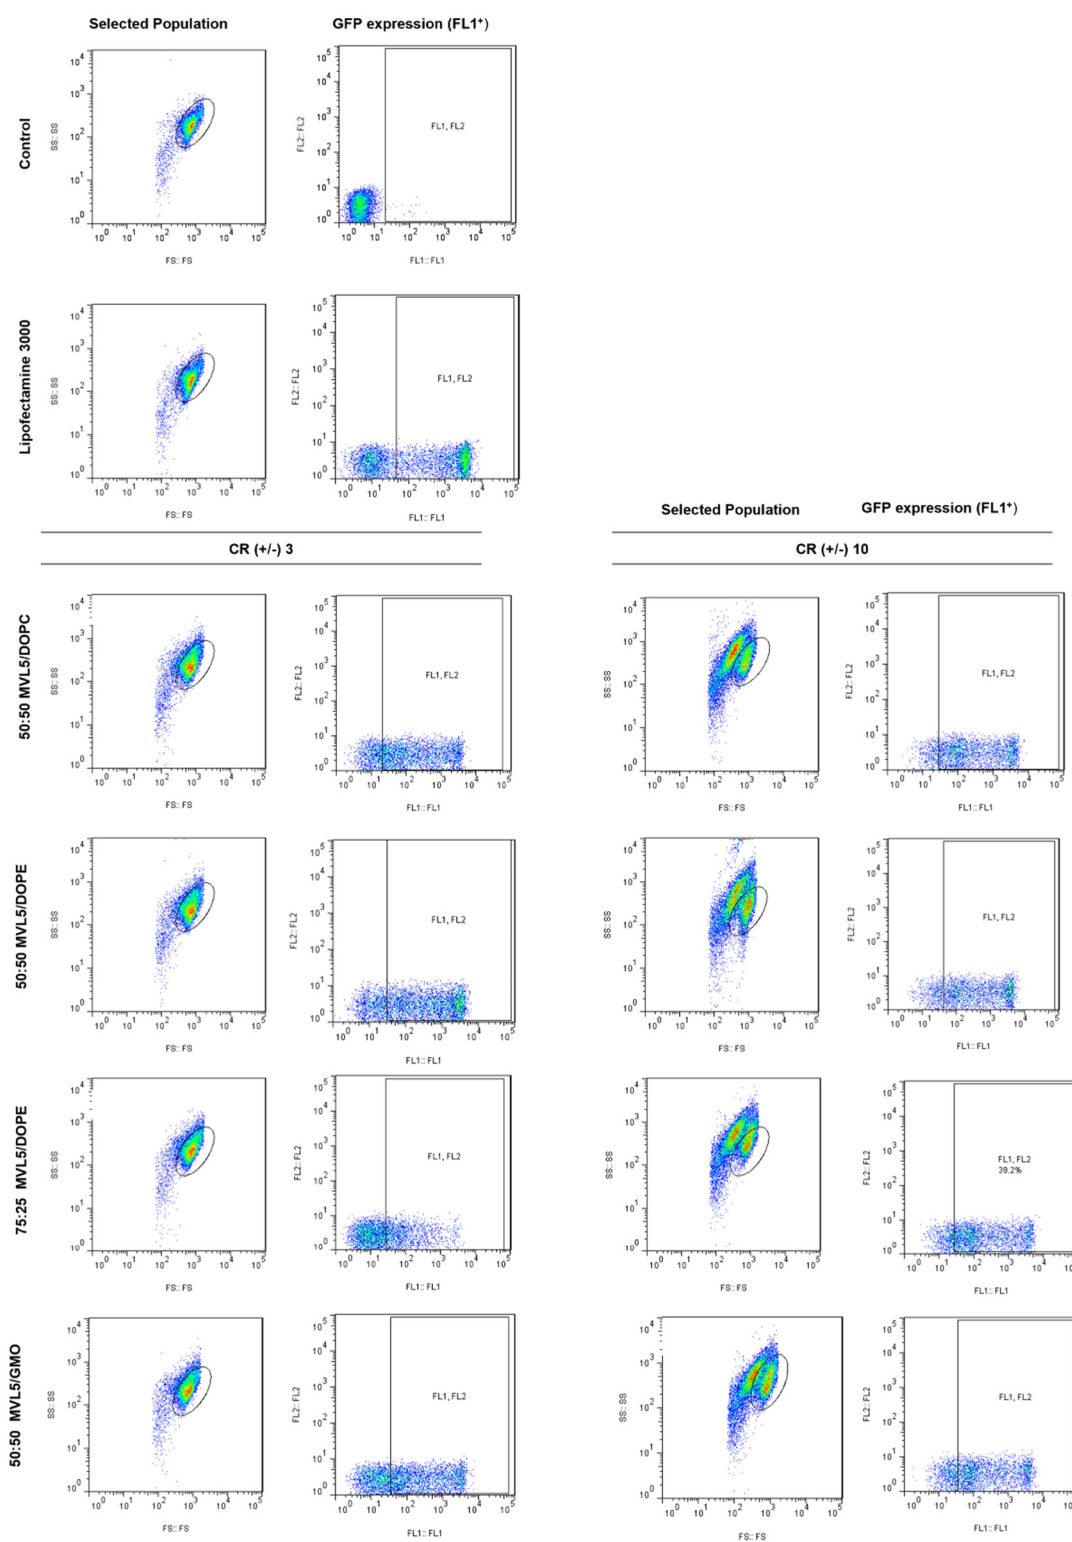

**Figure S1.** Flow cytometry of HEK 293T cells transfected with the Cas9/sgRNA-GFP plasmid (PX458). The control (HEK 293T untreated cells) was gated in SS for side-scattered light versus FS for forward-scattered light, and in FL1 versus FL2 for GFP signal). These gates were used for the following fluorescence analysis. Lipofectamine 3000 was used as positive control. FL1, FL2 subset represents GFP-positive cells. GFP was excited by a diode blue laser (488 nm) and the green fluorescence of cells was detected using a 530/50 nm bandpass filter in FL1 channel.

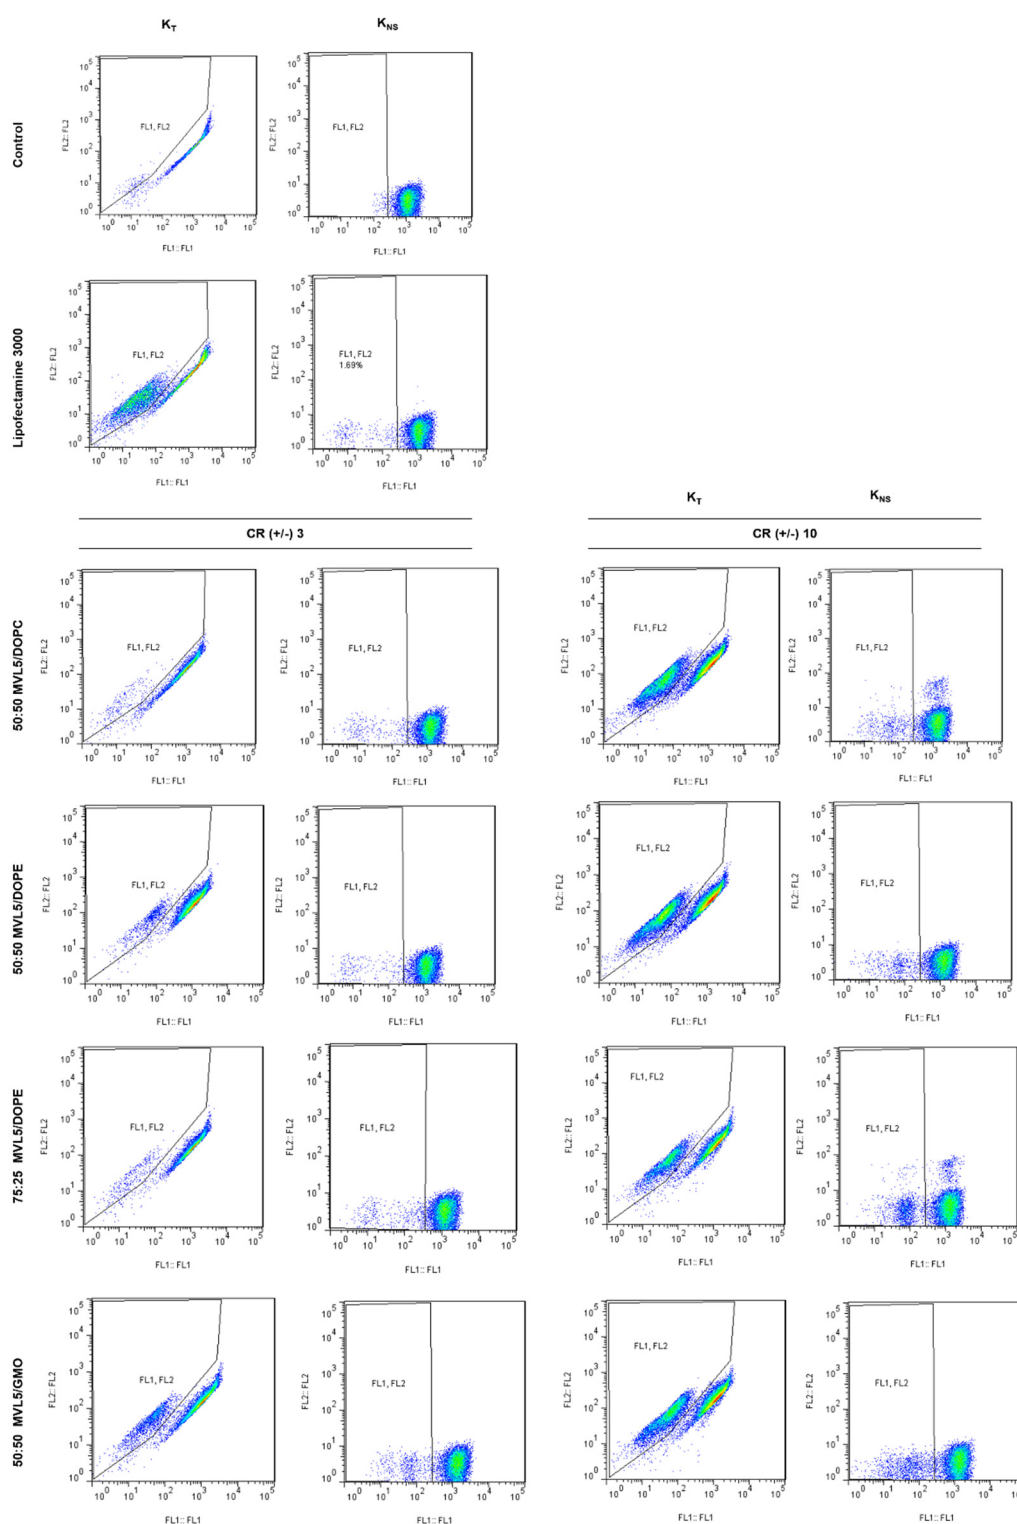

**Figure S2.** Flow cytometry histograms illustrating the GFP signal in HEK 293T-GFP cells. HEK 293T-GFP cells were treated with CL-DNA complexes containing negative control plasmid (PX459) or PX459-sgRNA-GFP to target *GFP* gene. Lipofectamine 3000 was used as positive control. Cell population and FL1 versus FL2 gates were defined for the control (HEK 293T-GFP cells) and were used for the following fluorescence analysis. FL1, FL2 subset represents the loss of GFP signal. GFP was excited by a diode blue laser (488 nm) and the green fluorescence of cells was detected using a 530/50 nm bandpass filter in FL1 channel. Data are expressed as the mean  $\pm$  SD (n=2).
